# Supplementary material
Source: Springer Nature journal article supplement (https://www.springermedizin.de/resource/supplementary/13058_2012_3049_MOESM1_ESM.pdf/9703152)

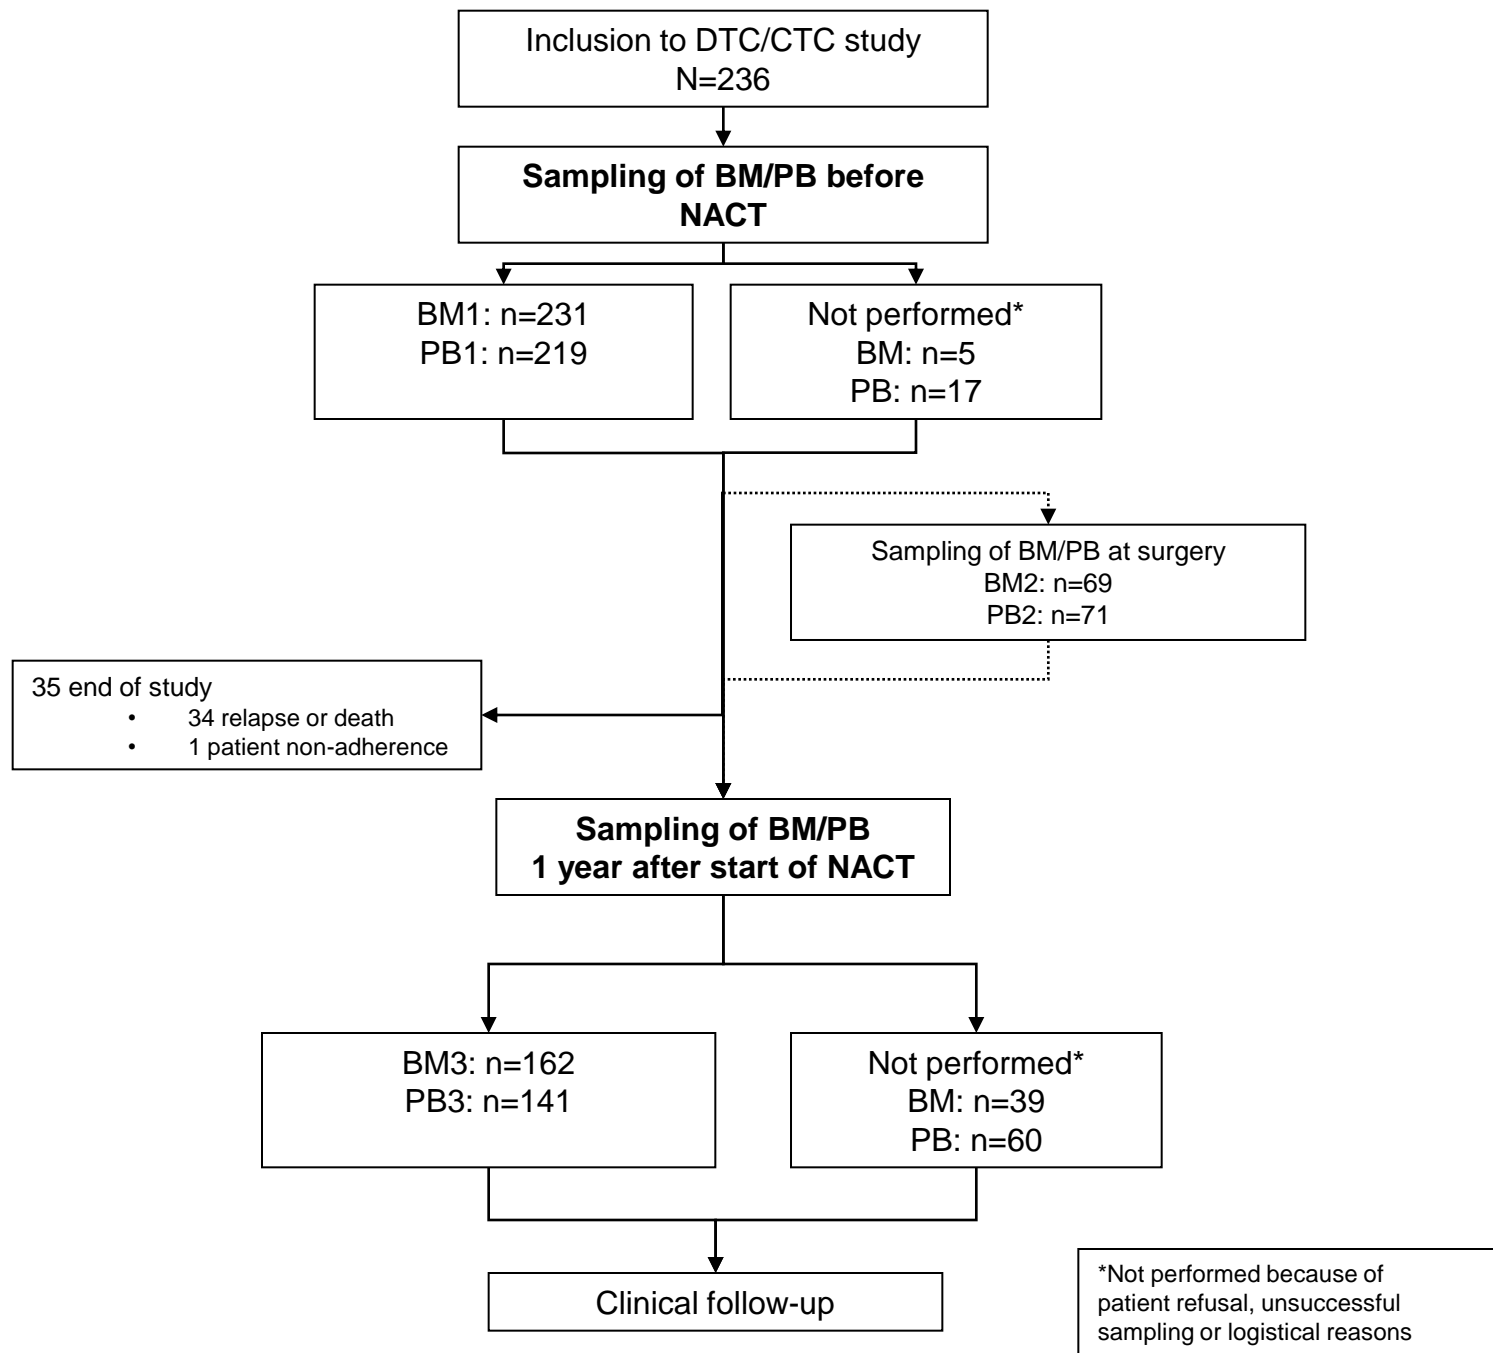

Supplement: MOESM1 [file 9703152]
